# Supplementary material for: Loss of IVNS1ABP, a gigaxonin paralogue, leads to a progeroid neuropathy due to impaired proteostasis
Source: bioRxiv or medRxiv preprint supplement (doi:10.1101/2024.10.23.24315364), 2024-10-29
Supplement: Supplementary file [file media-1.pdf]

**A**

II.1 patient

II.4 patient

II.5 patient

**B**

II.4 patient

II.5 patient

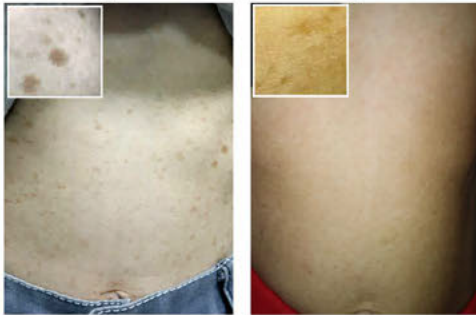**C**

Exome sequencing filtering II.1 patient

|                                                                         |       |
|-------------------------------------------------------------------------|-------|
| All variants (AF<0.1%)                                                  | 6,376 |
| All Homozygous variants                                                 | 228   |
| Homozygous variants in IBD blocks                                       | 17    |
| Exclude variants seen in in-house database (307 exomes)                 | 15    |
| Exclude homopolymers (false positive) & intronic variants (PhyloP<0.2)  | 7     |
| Exclude variants seen in population (ExAC & UK10, AF>0.0001)            | 3     |
| Exclude 'benign' exonic variants (Polyphen<0.8, SIFT>0.05, M-CAP<0.020) | 1     |

**D**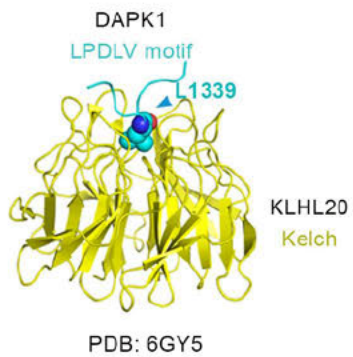**E**

GAN-null patient

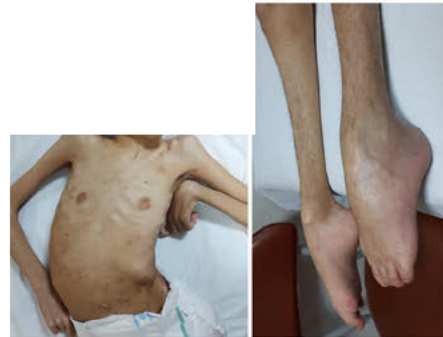

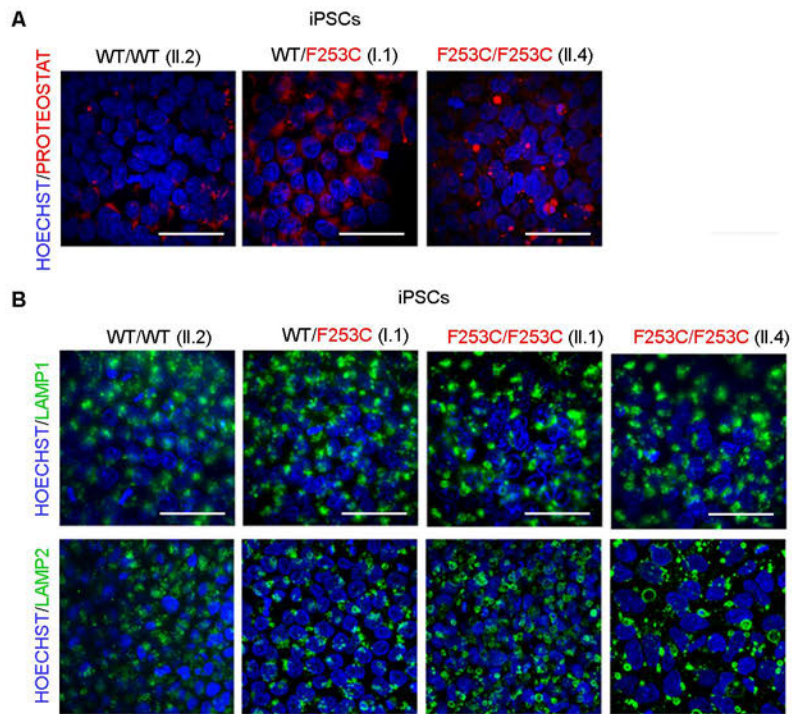

Figure S2  
C. Bonnard *et al.*, (2024)

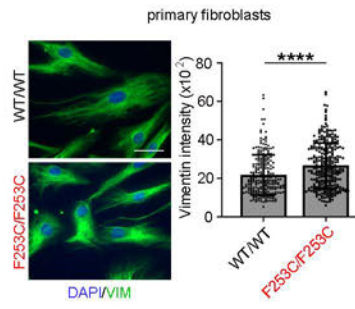

Figure S3  
C. Bonnard *et al.*, (2024)

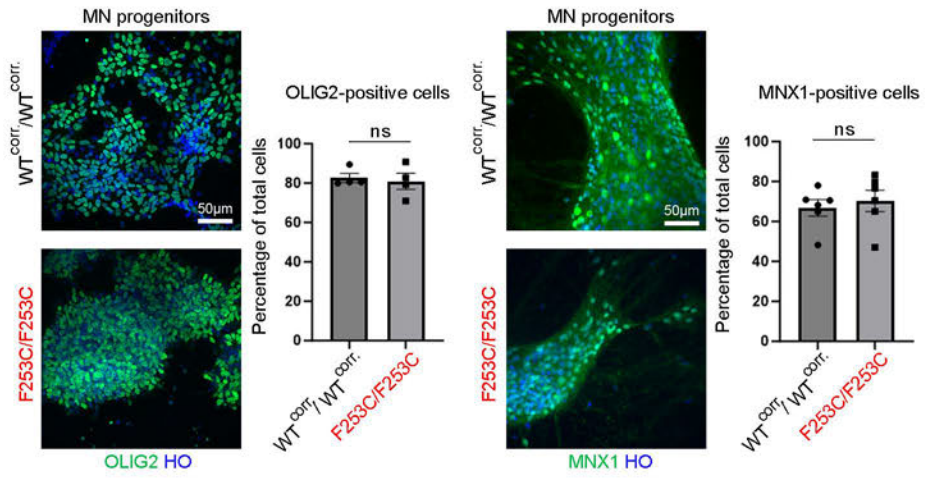

Figure S4  
C. Bonnard *et al.*, (2024)

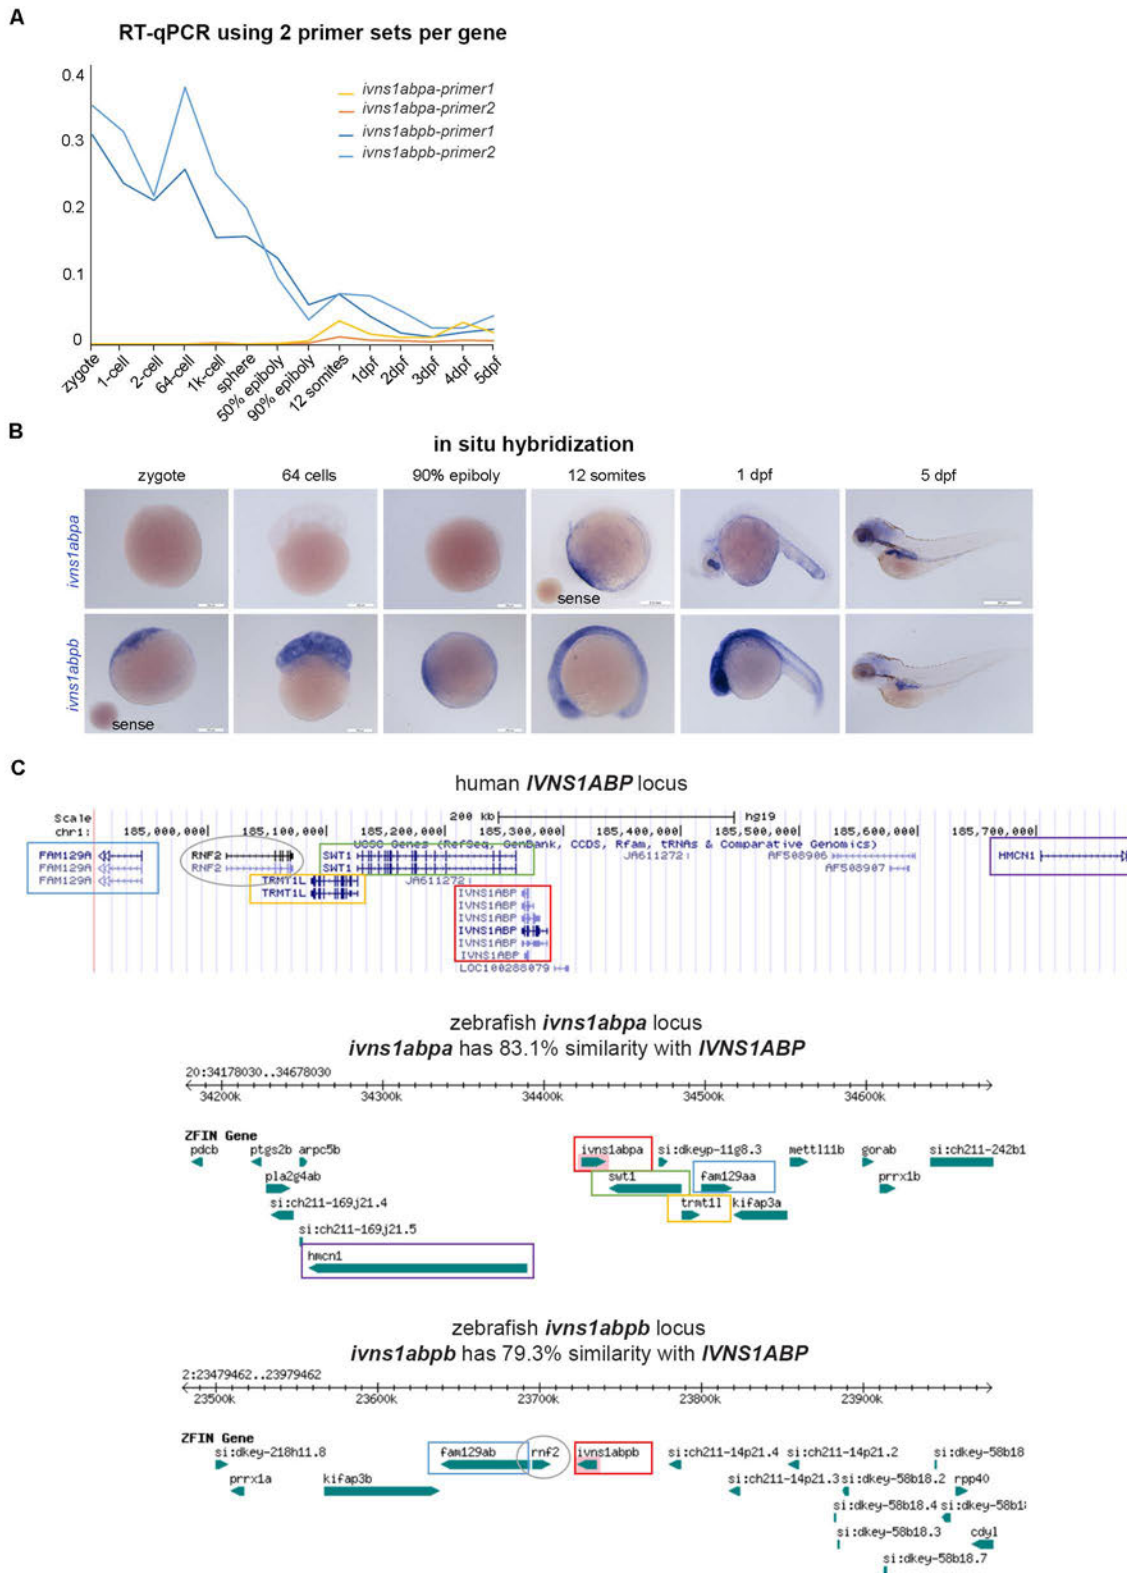

Figure S5  
 C.Bonnard *et al.*, (2024)

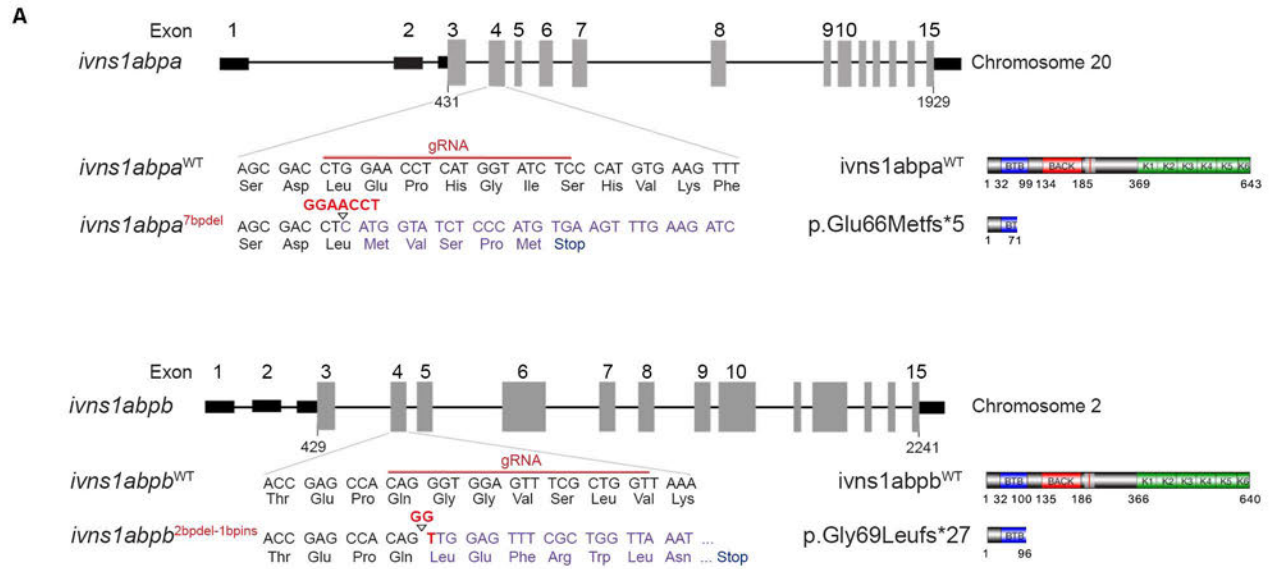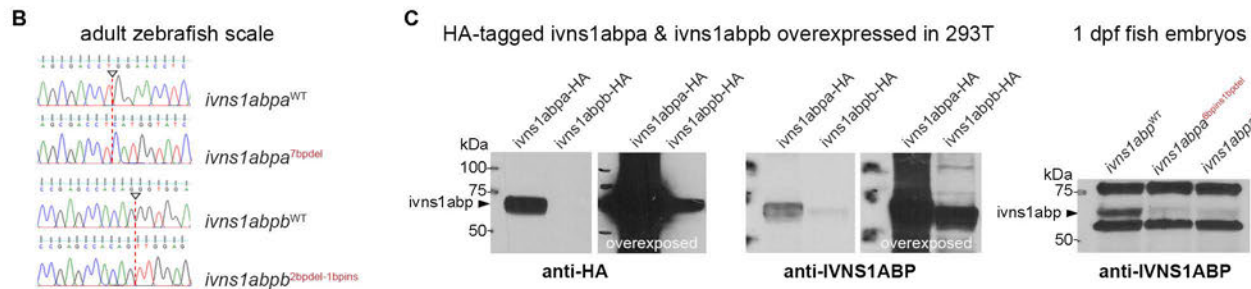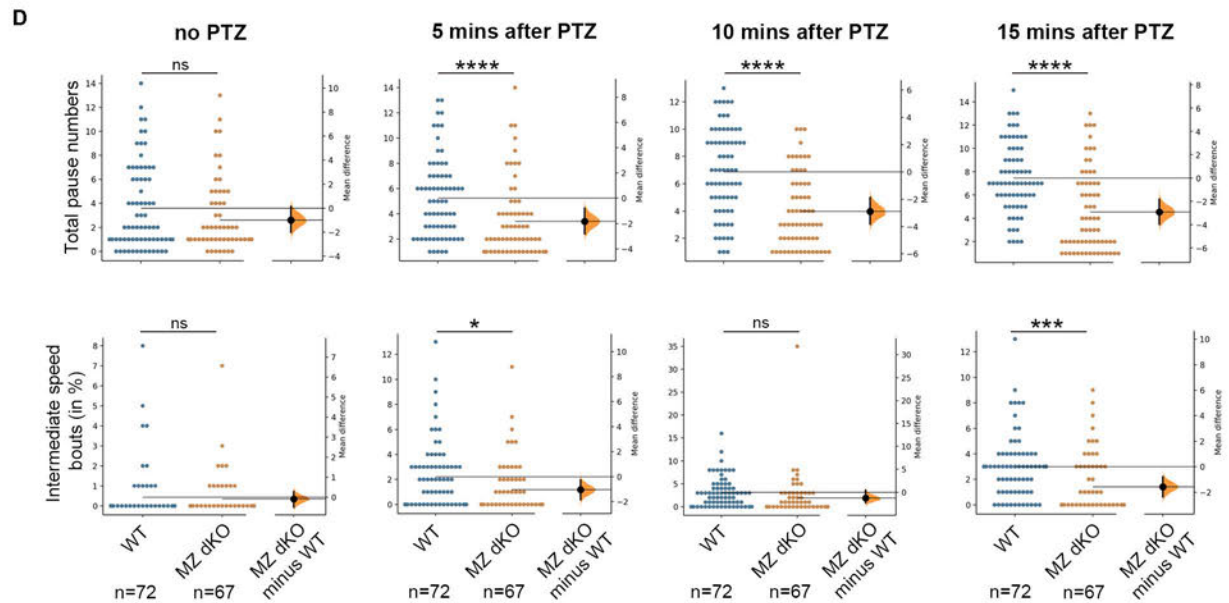

Figure S6  
C. Bonnard et al., (2024)

| Top list of ubiquitinated proteins with significant fold change (logFC) in two homozygous (HMZ) patients (II.1 & II.4) versus two controls wildtype (WT II.2) and heterozygous (HTZ I.1) |                                                                      |                |             |             |             |             |         |             |             |
|------------------------------------------------------------------------------------------------------------------------------------------------------------------------------------------|----------------------------------------------------------------------|----------------|-------------|-------------|-------------|-------------|---------|-------------|-------------|
|                                                                                                                                                                                          | Protein name                                                         | Gene           | II.2 (WT)   | I.1 (HTZ)   | II.1 (HMZ)  | II.4 (HMZ)  | p value | WTav        | MTav        |
| 1                                                                                                                                                                                        | Alpha-enolase                                                        | <i>ENO1</i>    | 253,738,039 | 233,746,418 | 167,852,203 | 189,183,389 | 0.0471  | 243,742,229 | 178,517,796 |
| 2                                                                                                                                                                                        | Glucosidase 2 subunit beta                                           | <i>PRKCSH</i>  | 36,156,970  | 37,294,114  | 44,963,055  | 44,837,468  | 0.0419  | 36,725,542  | 44,900,261  |
| 3                                                                                                                                                                                        | 60S ribosomal protein L5                                             | <i>RPL5</i>    | 22,565,294  | 22,109,299  | 27,170,165  | 26,581,446  | 0.0083  | 22,337,297  | 26,875,806  |
| 4                                                                                                                                                                                        | Heterogeneous nuclear ribonucleoprotein H2                           | <i>HNRNPH2</i> | 3,177,915   | 3,474,061   | 2,172,992   | 1,779,883   | 0.0371  | 3,325,988   | 1,976,437   |
| 5                                                                                                                                                                                        | Serine/arginine-rich splicing factor 6                               | <i>SRSF6</i>   | 4,675,644   | 4,815,498   | 5,136,883   | 5,295,910   | 0.0485  | 4,745,571   | 5,216,396   |
| 6                                                                                                                                                                                        | Isoform 8 of Protein transport protein Sec31A                        | <i>SEC31A</i>  | 5,005,881   | 5,101,888   | 6,811,001   | 6,819,738   | 0.0165  | 5,053,884   | 6,815,369   |
| 7                                                                                                                                                                                        | 40S ribosomal protein S23                                            | <i>RPS23</i>   | 7,030,710   | 6,489,940   | 9,079,727   | 8,411,920   | 0.0474  | 6,760,325   | 8,745,824   |
| 8                                                                                                                                                                                        | UMP-CMP kinase                                                       | <i>CMPK1</i>   | 5,188,959   | 5,498,722   | 3,706,928   | 3,489,043   | 0.0161  | 5,343,840   | 3,597,986   |
| 9                                                                                                                                                                                        | Methylmalonate-semialdehyde dehydrogenase [acylating], mitochondrial | <i>ALDH6A1</i> | 1,009,509   | 1,225,089   | 5,224,426   | 4,687,541   | 0.0232  | 1,117,299   | 4,955,983   |
| 10                                                                                                                                                                                       | Regulation of nuclear pre-mRNA domain-containing protein 1B          | <i>RPRD1B</i>  | 5,486,370   | 4,848,454   | 2,924,887   | 2,454,401   | 0.0301  | 5,167,412   | 2,689,644   |
| 11                                                                                                                                                                                       | Proteasome activator complex subunit 2                               | <i>PSME2</i>   | 6,574,865   | 6,759,166   | 7,628,436   | 7,827,150   | 0.0162  | 6,667,016   | 7,727,793   |
| 12                                                                                                                                                                                       | Exportin-7                                                           | <i>XPO7</i>    | 1,885,534   | 1,571,306   | 3,003,602   | 2,657,977   | 0.0428  | 1,728,420   | 2,830,789   |
| 13                                                                                                                                                                                       | Double-stranded RNA-binding protein Staufen homolog 2                | <i>STAU2</i>   | 826,243     | 807,304     | 920,381     | 953,286     | 0.0406  | 816,773     | 936,834     |
| 14                                                                                                                                                                                       | Isoform 2 of AP-1 complex subunit gamma-1                            | <i>APIG1</i>   | 2,177,996   | 2,713,351   | 3,953,431   | 4,384,684   | 0.0411  | 2,445,673   | 4,169,057   |
| 15                                                                                                                                                                                       | Thioredoxin reductase 1, cytoplasmic                                 | <i>TXNRD1</i>  | 6,360,014   | 6,949,799   | 10,597,122  | 10,462,265  | 0.0389  | 6,654,906   | 10,529,693  |
| 16                                                                                                                                                                                       | Nuclear pore glycoprotein p62                                        | <i>NUP62</i>   | 194,035     | 312,774     | 985,746     | 897,002     | 0.0145  | 253,405     | 941,374     |
| 17                                                                                                                                                                                       | Uridine 5'-monophosphate synthase                                    | <i>UMPS</i>    | 2,643,323   | 3,254,054   | 5,794,254   | 4,984,072   | 0.0468  | 2,948,688   | 5,389,163   |
| 18                                                                                                                                                                                       | Prolyl endopeptidase                                                 | <i>PREP</i>    | 1,424,477   | 1,582,483   | 655,172     | 874,623     | 0.0392  | 1,503,480   | 764,898     |
| 19                                                                                                                                                                                       | Isoform 2 of Cystathionine beta-synthase                             | <i>CBS</i>     | 1,239,382   | 762,118     | 2,664,919   | 3,176,507   | 0.0320  | 1,000,750   | 2,920,713   |
| 20                                                                                                                                                                                       | Calcium-binding protein 39                                           | <i>CAB39</i>   | 1,181,102   | 1,273,196   | 599,742     | 464,311     | 0.0196  | 1,227,149   | 532,026     |
| 21                                                                                                                                                                                       | Mini-chromosome maintenance complex-binding protein                  | <i>MCMBP</i>   | 173,211     | 291,392     | 751,242     | 860,679     | 0.0194  | 232,302     | 805,961     |
| 22                                                                                                                                                                                       | Costars family protein ABRACL                                        | <i>ABRACL</i>  | 411,472     | 439,530     | 264,889     | 248,893     | 0.0188  | 425,501     | 256,891     |
| 23                                                                                                                                                                                       | Nuclear receptor-binding protein                                     | <i>NRBP1</i>   | 244,697     | 209,813     | 64,231      | 101,227     | 0.0298  | 227,255     | 82,729      |
| 24                                                                                                                                                                                       | Mitochondrial carrier homolog 2                                      | <i>MTCH2</i>   | 503,657     | 361,894     | 1,356,402   | 1,621,239   | 0.0381  | 432,776     | 1,488,821   |
| 25                                                                                                                                                                                       | Ras-related GTP-binding protein D                                    | <i>RRAGD</i>   | 395,518     | 362,456     | 257,101     | 282,532     | 0.0395  | 378,987     | 269,816     |
| 26                                                                                                                                                                                       | Isoform 2 of Peptidyl-prolyl cis-trans isomerase FKBP8               | <i>FKBP8</i>   | 222,266     | 207,138     | 265,756     | 284,656     | 0.0415  | 214,702     | 275,206     |
| 27                                                                                                                                                                                       | RNA polymerase II elongation factor ELL3                             | <i>ELL3</i>    | 738,435     | 750,141     | 475,555     | 441,068     | 0.0230  | 744,288     | 458,312     |

| Top list of ubiquitinated peptides with significant fold change (logFC) in two homozygous (HMZ) patients (II.1 & II.4) versus two controls wildtype (WT II.2) and heterozygous (HTZ I.1) |                                                  |                                                                        |               |           |           |            |            |         |         |         |
|------------------------------------------------------------------------------------------------------------------------------------------------------------------------------------------|--------------------------------------------------|------------------------------------------------------------------------|---------------|-----------|-----------|------------|------------|---------|---------|---------|
|                                                                                                                                                                                          | Uniprot id                                       | protein name                                                           | Gene          | II.2 (WT) | I.1 (HTZ) | II.1 (HMZ) | II.4 (HMZ) | p value | WTav    | MTav    |
| 1                                                                                                                                                                                        | Q15004 [24-41] 1D[N11]1GG[K1]                    | PCNA-associated factor                                                 | <i>PCLAF</i>  | 92,345    | 81,620    | 350,598    | 361,567    | 0.0008  | 86,982  | 356,082 |
| 2                                                                                                                                                                                        | O43175 [381-394] 1D[N12]1GG[K4]                  | D-3-phosphoglycerate dehydrogenase                                     | <i>PHGDH</i>  | 66,489    | 57,045    | 178,801    | 167,317    | 0.0051  | 61,767  | 173,059 |
| 3                                                                                                                                                                                        | Q9ULK5 [372-382] 1GG[K8]                         | Vang-like protein 2                                                    | <i>VANGL2</i> | 13,944    | 41,303    | 838,698    | 777,508    | 0.0092  | 27,624  | 808,103 |
| 4                                                                                                                                                                                        | P13667 [235-246] 1GG[K11]                        | Protein disulfide-isomerase A4                                         | <i>PDIA4</i>  | 14,480    | 19,205    | 46,496     | 42,471     | 0.0134  | 16,843  | 44,484  |
| 5                                                                                                                                                                                        | P20700 [529-542] 1GG[K4]                         | Lamin-B1                                                               | <i>LMNB1</i>  | 20,378    | 26,238    | 54,291     | 49,773     | 0.0193  | 23,308  | 52,032  |
| 6                                                                                                                                                                                        | P68104 [393-408] 1GG[K3]                         | Elongation factor 1-alpha 1                                            | <i>EEF1A1</i> | 39,961    | 31,584    | 69,954     | 76,259     | 0.0232  | 35,772  | 73,107  |
| 7                                                                                                                                                                                        | Q8NOX7 [460-475] 1GG[K6]                         | Spartin                                                                | <i>SPART</i>  | 48,172    | 66,184    | 135,506    | 121,283    | 0.0283  | 57,178  | 128,394 |
| 8                                                                                                                                                                                        | P68036-3 [181-191] 1GG[K9]                       | Isoform 3 of Ubiquitin-conjugating enzyme E2 L3                        | <i>UBE2L3</i> | 145,488   | 119,269   | 262,646    | 299,609    | 0.0289  | 132,379 | 281,128 |
| 9                                                                                                                                                                                        | P62913 [170-178] 1GG[K9]                         | 60S ribosomal protein L11                                              | <i>RPL11</i>  | 63,366    | 57,250    | 102,097    | 103,962    | 0.0309  | 60,308  | 103,030 |
| 10                                                                                                                                                                                       | Q13286 [256-272] 1GG[K7]                         | Battenin                                                               | <i>CLN3</i>   | 110,190   | 119,520   | 428,711    | 390,306    | 0.0319  | 114,855 | 409,508 |
| 11                                                                                                                                                                                       | P61088 [71-82] 1GG[K4]                           | Ubiquitin-conjugating enzyme E2 N                                      | <i>UBE2N</i>  | 310,585   | 292,777   | 381,802    | 372,069    | 0.0341  | 301,681 | 376,935 |
| 12                                                                                                                                                                                       | P68036-3 [130-140] 1GG[K2]                       | Isoform 3 of Ubiquitin-conjugating enzyme E2 L3                        | <i>UBE2L3</i> | 367,511   | 511,829   | 899,490    | 1,001,458  | 0.0363  | 439,670 | 950,474 |
| 13                                                                                                                                                                                       | P45973 [144-159] 1GG[K]                          | Chromobox protein homolog 5                                            | <i>CBX5</i>   | 181,323   | 194,661   | 133,568    | 127,051    | 0.0371  | 187,992 | 130,310 |
| 14                                                                                                                                                                                       | P11142 [518-526]; PODMV8 [518-526] 1O[M1]1GG[K7] | Heat shock cognate 71 kDa protein                                      | <i>HSPA8</i>  | 77,995    | 83,296    | 244,315    | 219,601    | 0.0431  | 80,646  | 231,958 |
| 15                                                                                                                                                                                       | Q7Z569 [377-400] 2C[C15C20]2GG[K5K9]             | BRCA1-associated protein                                               | <i>BRAP</i>   | 61,446    | 45,855    | 120,330    | 145,057    | 0.0465  | 53,650  | 132,694 |
| 16                                                                                                                                                                                       | P62714 [37-49]; P67775 [37-49] 1GG[K5]           | Serine/threonine-protein phosphatase 2A catalytic subunit beta isoform | <i>PPP2CB</i> | 99,913    | 97,869    | 198,207    | 183,564    | 0.0466  | 98,891  | 190,885 |
| 17                                                                                                                                                                                       | P11142 [518-526]; PODMV8 [518-526] 1GG[K7]       | Heat shock cognate 71 kDa protein                                      | <i>HSPA8</i>  | 430,899   | 407,282   | 780,296    | 862,300    | 0.0483  | 419,090 | 821,298 |



| Top list of ubiquitinated peptide targets matched against fold change (protein_fc) and p-value (protein.Pvalue) in corresponding protein. |                                 |                                                   |               |           |           |            |            |        |        |        |
|-------------------------------------------------------------------------------------------------------------------------------------------|---------------------------------|---------------------------------------------------|---------------|-----------|-----------|------------|------------|--------|--------|--------|
|                                                                                                                                           | Uniprot id                      | protein name                                      | Gene          | II.2 (WT) | I.1 (HTZ) | II.1 (HMZ) | II.4 (HMZ) | pvalue | WTav   | MTav   |
| 1                                                                                                                                         | Q99426 [197-211] 1D[N13]1GG[K7] | Tubulin-folding cofactor B                        | <i>TBCB</i>   | 0.0014    | 0.0013    | 0.0020     | 0.0020     | 0.0064 | 0.0014 | 0.0020 |
| 2                                                                                                                                         | P63104 [139-157] 1GG[K1]        | 14-3-3 protein zeta/delta                         | <i>YWHAZ</i>  | 0.0002    | 0.0002    | 0.0004     | 0.0004     | 0.0143 | 0.0002 | 0.0004 |
| 3                                                                                                                                         | P15121 [257-269] 1GG[K7]        | Aldose reductase                                  | <i>AKR1B1</i> | 0.0021    | 0.0023    | 0.0031     | 0.0032     | 0.0239 | 0.0022 | 0.0032 |
| 4                                                                                                                                         | P62258 [62-73] 1GG[K8]          | 14-3-3 protein epsilon                            | <i>YWHAE</i>  | 0.0004    | 0.0003    | 0.0006     | 0.0007     | 0.0275 | 0.0003 | 0.0006 |
| 5                                                                                                                                         | Q15233 [97-107] 1GG[K3]         | Non-POU domain-containing octamer-binding protein | <i>NONO</i>   | 0.0004    | 0.0003    | 0.0007     | 0.0006     | 0.0281 | 0.0004 | 0.0007 |
| 6                                                                                                                                         | Q96FW1 [84-94] 1C[C8]1GG[K1]    | Ubiquitin thioesterase OTUB1                      | <i>OTUB1</i>  | 0.0018    | 0.0026    | 0.0053     | 0.0059     | 0.0321 | 0.0022 | 0.0056 |
| 7                                                                                                                                         | P84103 [78-86] 1D[N5]1GG[K8]    | Serine/arginine-rich splicing factor 3            | <i>SRSF3</i>  | 0.0047    | 0.0036    | 0.0086     | 0.0080     | 0.0389 | 0.0041 | 0.0083 |
| 8                                                                                                                                         | P68036-3 [130-140] 1GG[K2]      | Isoform 3 of Ubiquitin-conjugating enzyme E2 L3   | <i>UBE2L3</i> | 0.0255    | 0.0387    | 0.0798     | 0.0967     | 0.0390 | 0.0321 | 0.0882 |
| 9                                                                                                                                         | Q06830 [169-190] 1C[C5]1GG[K10] | Peroxisredoxin-1                                  | <i>PRDX1</i>  | 0.0003    | 0.0004    | 0.0006     | 0.0007     | 0.0394 | 0.0003 | 0.0007 |
| 10                                                                                                                                        | P08670 [441-450] 1GG[K5]        | Vimentin                                          | <i>VIM</i>    | 0.0000    | 0.0001    | 0.0001     | 0.0001     | 0.0481 | 0.0001 | 9.5469 |

| Top 20 pathways enrichment analysis with the ubipeptide results |                                                               |         |                 |           |           |           |           |      |                                |
|-----------------------------------------------------------------|---------------------------------------------------------------|---------|-----------------|-----------|-----------|-----------|-----------|------|--------------------------------|
| ID                                                              | Description                                                   | setSize | enrichmentScore | NES       | p value   | p.adjust  | q values  | rank | leading_edge                   |
| R-HSA-168256                                                    | Immune System                                                 | 81      | 0.394677963     | 1.9579749 | 0.0010152 | 0.0044235 | 0.0024932 | 298  | tags=77%, list=49%, signal=45% |
| R-HSA-1266738                                                   | Developmental Biology                                         | 52      | 0.456079873     | 2.0903467 | 0.0010331 | 0.0044235 | 0.0024932 | 149  | tags=52%, list=25%, signal=43% |
| R-HSA-8953854                                                   | Metabolism of RNA                                             | 55      | 0.43914376      | 2.0330473 | 0.0010341 | 0.0044235 | 0.0024932 | 106  | tags=42%, list=17%, signal=38% |
| R-HSA-168249                                                    | Innate Immune System                                          | 53      | 0.422965382     | 1.9371094 | 0.0010363 | 0.0044235 | 0.0024932 | 298  | tags=81%, list=49%, signal=45% |
| R-HSA-422475                                                    | Axon guidance                                                 | 45      | 0.526296791     | 2.3517864 | 0.0010428 | 0.0044235 | 0.0024932 | 149  | tags=60%, list=25%, signal=49% |
| R-HSA-5663205                                                   | Infectious disease                                            | 40      | 0.470011733     | 2.0467143 | 0.0010571 | 0.0044235 | 0.0024932 | 83   | tags=40%, list=14%, signal=37% |
| R-HSA-5653656                                                   | Vesicle-mediated transport                                    | 33      | 0.426037513     | 1.7922912 | 0.001065  | 0.0044235 | 0.0024932 | 253  | tags=73%, list=42%, signal=45% |
| R-HSA-199991                                                    | Membrane Trafficking                                          | 30      | 0.458408656     | 1.8765067 | 0.0010834 | 0.0044235 | 0.0024932 | 253  | tags=77%, list=42%, signal=47% |
| R-HSA-194315                                                    | Signaling by Rho GTPases                                      | 30      | 0.4817795       | 1.9721694 | 0.0010834 | 0.0044235 | 0.0024932 | 145  | tags=57%, list=24%, signal=45% |
| R-HSA-195258                                                    | RHO GTPase Effectors                                          | 29      | 0.494899788     | 2.0140785 | 0.0010846 | 0.0044235 | 0.0024932 | 145  | tags=59%, list=24%, signal=47% |
| R-HSA-71291                                                     | Metabolism of amino acids and derivatives                     | 28      | 0.515457693     | 2.0790955 | 0.0010893 | 0.0044235 | 0.0024932 | 99   | tags=50%, list=16%, signal=44% |
| R-HSA-376176                                                    | Signaling by ROBO receptors                                   | 28      | 0.538835138     | 2.1733883 | 0.0010893 | 0.0044235 | 0.0024932 | 142  | tags=61%, list=23%, signal=49% |
| R-HSA-72766                                                     | Translation                                                   | 26      | 0.504990508     | 2.0053614 | 0.0010965 | 0.0044235 | 0.0024932 | 103  | tags=50%, list=17%, signal=43% |
| R-HSA-168254                                                    | Influenza Infection                                           | 24      | 0.581865839     | 2.2590866 | 0.0011123 | 0.0044235 | 0.0024932 | 99   | tags=54%, list=16%, signal=47% |
| R-HSA-168255                                                    | Influenza Life Cycle                                          | 24      | 0.581865839     | 2.2590866 | 0.0011123 | 0.0044235 | 0.0024932 | 99   | tags=54%, list=16%, signal=47% |
| R-HSA-9010553                                                   | Regulation of expression of SLITs and ROBOs                   | 24      | 0.56164222      | 2.1805686 | 0.0011123 | 0.0044235 | 0.0024932 | 99   | tags=54%, list=16%, signal=47% |
| R-HSA-1799339                                                   | SRP-dependent cotranslational protein targeting to membrane   | 22      | 0.593006086     | 2.246981  | 0.0011236 | 0.0044235 | 0.0024932 | 103  | tags=59%, list=17%, signal=51% |
| R-HSA-927802                                                    | Nonsense-Mediated Decay (NMD)                                 | 22      | 0.606081531     | 2.2965257 | 0.0011236 | 0.0044235 | 0.0024932 | 99   | tags=59%, list=16%, signal=51% |
| R-HSA-975957                                                    | Nonsense Mediated Decay (NMD) enhanced by the Exon Junct      | 22      | 0.606081531     | 2.2965257 | 0.0011236 | 0.0044235 | 0.0024932 | 99   | tags=59%, list=16%, signal=51% |
| R-HSA-6791226                                                   | Major pathway of rRNA processing in the nucleolus and cytosol | 21      | 0.583865908     | 2.1791561 | 0.0011338 | 0.0044235 | 0.0024932 | 99   | tags=57%, list=16%, signal=50% |

**Table S1**

**C. Bonnard *et al.*, (2024)**
